# Supplementary material
Source: Atypon-hosted journal article supplement (doi:10.1287/ijoc.2024.0996)
Supplement: ijoc.2024.0996.cd.zip [file tables.pdf › 2024.0996-main/results/tables.pdf]

**Table 1** Crossover results ( $10^{-8}$  solutions) for the first half of the 100 NETLIB instances.

| prob     | nRows | nCols | # supp. |      |       | time (sec) |        |       |           | nOLS   |      |
|----------|-------|-------|---------|------|-------|------------|--------|-------|-----------|--------|------|
|          |       |       | PDLP    | COPT | cross | cross      | primal | dual  | lin. ind. | primal | dual |
| 25fv47   | 821   | 1571  | 600     | 583  | 584   | 0.20       | 0.03   | 0.07  | 0.03      | 17     | 50   |
| 80bau3b  | 2262  | 9799  | 1851    | 1758 | 1752  | 1.22d      | 0.15   | 0.34  | 0.73      | 86     | 205  |
| adlittle | 56    | 97    | 61      | 45   | 45    | 0.01       | 0.01   | 0.00  | 0.00      | 17     | 2    |
| afiro    | 27    | 32    | 14      | 13   | 13    | 0.00       | 0.00   | 0.00  | 0.00      | 2      | 2    |
| agg      | 488   | 163   | 62      | 57   | 57    | 0.01       | 0.00   | 0.00  | 0.00      | 6      | 2    |
| agg2     | 516   | 302   | 141     | 120  | 121   | 0.02       | 0.01   | 0.00  | 0.00      | 26     | 4    |
| agg3     | 516   | 302   | 144     | 124  | 124   | 0.01       | 0.01   | 0.00  | 0.00      | 26     | 2    |
| bandm    | 305   | 472   | 306     | 294  | 294   | 0.01       | 0.00   | 0.00  | 0.00      | 2      | 2    |
| beaconfd | 173   | 262   | 89      | 89   | 89    | 0.00       | 0.00   | 0.00  | 0.00      | 2      | 2    |
| blend    | 74    | 83    | 56      | 54   | 54    | 0.00       | 0.00   | 0.00  | 0.00      | 3      | 3    |
| bnl1     | 643   | 1175  | 689     | 451  | 449   | 0.34       | 0.31   | 0.01  | 0.02      | 230    | 5    |
| bnl2     | 2324  | 3489  | 1519    | 1171 | 1164  | 1.92       | 0.74   | 0.17  | 1.01      | 358    | 78   |
| boeing1  | 351   | 384   | 207     | 196  | 195   | 0.02       | 0.01   | 0.01  | 0.00      | 15     | 26   |
| boeing2  | 166   | 143   | 69      | 55   | 57    | 0.01       | 0.00   | 0.01  | 0.00      | 14     | 30   |
| bore3d   | 233   | 315   | 126     | 126  | 126   | 0.00       | 0.00   | 0.00  | 0.00      | 2      | 2    |
| brandy   | 220   | 249   | 135     | 134  | 134   | 0.01       | 0.00   | 0.00  | 0.00      | 2      | 2    |
| capri    | 271   | 353   | 246     | 220  | 220   | 0.02       | 0.02   | 0.00  | 0.00      | 35     | 8    |
| cre-a    | 3516  | 4067  | 579     | 492  | 491   | 11.30      | 0.16   | 10.27 | 0.86      | 112    | 1026 |
| cre-c    | 3068  | 3678  | 590     | 508  | 504   | 9.00       | 0.15   | 8.08  | 0.77      | 99     | 766  |
| cycle    | 1903  | 2857  | 994     | 224  | 445   | 1.04       | 0.34   | 0.45  | 0.25      | 401    | 384  |
| czprob   | 929   | 3523  | 924     | 866  | 866   | 0.12       | 0.09   | 0.00  | 0.03      | 59     | 2    |
| d2q06c   | 2171  | 5167  | 1612    | 1543 | 1543  | 1.54       | 0.32   | 0.56  | 0.66      | 31     | 121  |
| d6cube   | 415   | 6184  | 136     | 115  | 110   | 0.58       | 0.02   | 0.54  | 0.01      | 21     | 284  |
| degen2   | 444   | 534   | 207     | 207  | 207   | 0.28       | 0.00   | 0.25  | 0.03      | 2      | 206  |
| degen3   | 1503  | 1818  | 640     | 637  | 638   | 8.14       | 0.01   | 7.33  | 0.79      | 3      | 776  |
| e226     | 223   | 282   | 127     | 127  | 127   | 0.01       | 0.00   | 0.00  | 0.00      | 2      | 5    |
| etamacro | 400   | 688   | 292     | 271  | 272   | 0.03       | 0.01   | 0.02  | 0.01      | 22     | 50   |
| ffff800  | 524   | 854   | 357     | 312  | 307   | 0.04       | 0.02   | 0.01  | 0.01      | 52     | 36   |
| finnis   | 497   | 614   | 259     | 227  | 230   | 0.05       | 0.02   | 0.02  | 0.01      | 48     | 54   |
| fit1d    | 24    | 1026  | 12      | 12   | 12    | 0.00       | 0.00   | 0.00  | 0.00      | 2      | 0    |
| fit1p    | 627   | 1677  | 634     | 627  | 627   | 0.00       | 0.00   | 0.00  | 0.00      | 2      | 0    |
| fit2d    | 25    | 10500 | 22      | 20   | 20    | 0.01       | 0.00   | 0.00  | 0.00      | 3      | 0    |
| fit2p    | 3000  | 13525 | 3004    | 2997 | 2997  | 0.04       | 0.00   | 0.01  | 0.03      | 2      | 4    |
| forplan  | 161   | 421   | 83      | 83   | 83    | 0.01       | 0.00   | 0.01  | 0.00      | 2      | 25   |
| ganges   | 1309  | 1681  | 1278    | 1175 | 1174  | 0.18       | 0.08   | 0.00  | 0.09      | 103    | 6    |
| gfrd-pnc | 616   | 1092  | 349     | 336  | 336   | 0.09       | 0.00   | 0.06  | 0.02      | 2      | 125  |
| greenbeb | 2392  | 5405  | 1048    | 937  | 936   | 2.77       | 0.25   | 1.47  | 1.04      | 104    | 404  |
| grow15   | 300   | 645   | 533     | 299  | 300   | 0.24       | 0.24   | 0.00  | 0.00      | 234    | 0    |
| grow22   | 440   | 946   | 849     | 440  | 440   | 0.62       | 0.62   | 0.00  | 0.00      | 410    | 0    |
| grow7    | 140   | 301   | 237     | 140  | 140   | 0.05       | 0.05   | 0.00  | 0.00      | 98     | 0    |
| israel   | 174   | 142   | 80      | 70   | 69    | 0.01       | 0.01   | 0.00  | 0.00      | 20     | 0    |
| kb2      | 43    | 41    | 27      | 27   | 27    | 0.00       | 0.00   | 0.00  | 0.00      | 2      | 0    |
| ken-07   | 2426  | 3602  | 2236    | 2234 | 2234  | 1.27       | 0.00   | 0.05  | 1.22      | 2      | 65   |
| lotfi    | 153   | 308   | 126     | 99   | 99    | 0.01       | 0.01   | 0.00  | 0.00      | 29     | 2    |
| maros-r7 | 3136  | 9408  | 3136    | 3136 | 3136  | 0.09       | 0.06   | 0.00  | 0.01      | 2      | 0    |
| maros    | 846   | 1443  | 345     | 340  | 339   | 0.32       | 0.01   | 0.27  | 0.05      | 7      | 162  |
| modszk1  | 687   | 1620  | 666     | 666  | 666   | 0.09       | 0.02   | 0.03  | 0.03      | 2      | 20   |
| nesm     | 662   | 2923  | 726     | 550  | 543   | 0.26       | 0.25   | 0.00  | 0.00      | 188    | 2    |
| osa-07   | 1118  | 23949 | 357     | 355  | 355   | 0.05       | 0.01   | 0.01  | 0.02      | 8      | 6    |
| osa-14   | 2337  | 52460 | 873     | 781  | 781   | 0.52       | 0.35   | 0.03  | 0.12      | 93     | 6    |

“p” means the basis is only primal optimal (dual infeasible). “d” means the basis is only dual optimal (primal infeasible). “a” means the basis is near-optimal but primal-dual infeasible. All OLS subproblems are solved by direct QR factorization.

**Table 2** Crossover results ( $10^{-8}$  solutions) for the second half of the 100 NETLIB instances.

| prob     | nRows | nCols  | # supp. |      |       | time (sec) |        |      |           | nOLS   |      |
|----------|-------|--------|---------|------|-------|------------|--------|------|-----------|--------|------|
|          |       |        | PDLP    | COPT | cross | cross      | primal | dual | lin. ind. | primal | dual |
| osa-30   | 4350  | 100024 | 1733    | 1536 | 1536  | 2.00       | 1.47   | 0.06 | 0.46      | 207    | 6    |
| pds-02   | 2953  | 7535   | 1379    | 332  | 331   | 1.68       | 0.79   | 0.38 | 0.51      | 432    | 396  |
| perold   | 625   | 1376   | 580     | 546  | 549   | 0.16d      | 0.08   | 0.05 | 0.02      | 38     | 27   |
| pilot.ja | 940   | 1988   | 789     | 681  | 678   | 0.58d      | 0.40   | 0.09 | 0.09      | 92     | 30   |
| pilot    | 1441  | 3652   | 1299    | 1287 | 1282  | 0.58p      | 0.28   | 0.09 | 0.20      | 22     | 8    |
| pilot4   | 410   | 1000   | 374     | 364  | 364   | 0.04       | 0.02   | 0.01 | 0.01      | 14     | 7    |
| pilot87  | 2030  | 4883   | 1856    | 1840 | 1840  | 1.10       | 0.45   | 0.31 | 0.31      | 17     | 15   |
| pilotnov | 975   | 2172   | 1809    | 708  | 650   | 1.83d      | 1.71   | 0.00 | 0.12      | 1163   | 2    |
| qap12    | 3192  | 8856   | 2940    | 2462 | 2466  | 66.60      | 32.42  | 8.85 | 25.33     | 435    | 216  |
| qap8     | 912   | 1632   | 656     | 466  | 442   | 0.82       | 0.26   | 0.20 | 0.36      | 56     | 112  |
| recipe   | 91    | 180    | 24      | 24   | 24    | 0.00       | 0.00   | 0.00 | 0.00      | 2      | 5    |
| sc105    | 105   | 103    | 85      | 85   | 85    | 0.00       | 0.00   | 0.00 | 0.00      | 2      | 6    |
| sc205    | 205   | 203    | 184     | 184  | 184   | 0.01       | 0.00   | 0.00 | 0.00      | 2      | 6    |
| sc50a    | 50    | 48     | 42      | 42   | 42    | 0.00       | 0.00   | 0.00 | 0.00      | 2      | 2    |
| sc50b    | 50    | 48     | 48      | 48   | 48    | 0.01       | 0.00   | 0.00 | 0.01      | 2      | 2    |
| scagr25  | 471   | 500    | 317     | 307  | 307   | 0.01       | 0.00   | 0.00 | 0.00      | 2      | 2    |
| scagr7   | 129   | 140    | 98      | 97   | 97    | 0.00       | 0.00   | 0.00 | 0.00      | 2      | 0    |
| scfxm1   | 330   | 457    | 248     | 231  | 231   | 0.02       | 0.01   | 0.01 | 0.00      | 13     | 21   |
| scfxm2   | 660   | 914    | 501     | 473  | 471   | 0.05       | 0.02   | 0.02 | 0.01      | 24     | 27   |
| scfxm3   | 990   | 1371   | 754     | 711  | 711   | 0.11       | 0.04   | 0.03 | 0.04      | 35     | 33   |
| scorpion | 388   | 358    | 245     | 245  | 245   | 0.01       | 0.00   | 0.00 | 0.01      | 2      | 2    |
| scrs8    | 490   | 1169   | 276     | 276  | 276   | 0.02       | 0.00   | 0.00 | 0.01      | 2      | 10   |
| scsd1    | 77    | 760    | 31      | 7    | 12    | 0.02       | 0.00   | 0.01 | 0.00      | 13     | 60   |
| scsd6    | 147   | 1350   | 182     | 63   | 66    | 0.06       | 0.04   | 0.01 | 0.00      | 85     | 52   |
| scsd8    | 397   | 2750   | 551     | 147  | 354   | 0.14       | 0.12   | 0.01 | 0.00      | 175    | 23   |
| sctap1   | 300   | 480    | 263     | 164  | 164   | 0.07       | 0.05   | 0.01 | 0.00      | 102    | 46   |
| sctap2   | 1090  | 1880   | 811     | 562  | 561   | 0.26       | 0.11   | 0.06 | 0.09      | 231    | 143  |
| sctap3   | 1480  | 2480   | 1038    | 731  | 730   | 0.51       | 0.16   | 0.13 | 0.21      | 279    | 270  |
| seba     | 515   | 1028   | 438     | 438  | 438   | 0.00       | 0.00   | 0.00 | 0.00      | 2      | 2    |
| share1b  | 117   | 225    | 95      | 94   | 94    | 0.00       | 0.00   | 0.00 | 0.00      | 2      | 0    |
| share2b  | 96    | 79     | 52      | 48   | 48    | 0.01       | 0.00   | 0.00 | 0.00      | 7      | 11   |
| shell    | 536   | 1775   | 391     | 383  | 383   | 0.03       | 0.00   | 0.01 | 0.02      | 2      | 48   |
| ship04l  | 402   | 2118   | 261     | 260  | 260   | 0.01       | 0.00   | 0.01 | 0.01      | 2      | 24   |
| ship04s  | 402   | 1458   | 281     | 280  | 280   | 0.02       | 0.00   | 0.01 | 0.01      | 2      | 16   |
| ship08l  | 778   | 4283   | 422     | 422  | 422   | 0.08       | 0.00   | 0.03 | 0.05      | 2      | 34   |
| ship08s  | 778   | 2387   | 447     | 447  | 447   | 0.06       | 0.00   | 0.01 | 0.05      | 2      | 22   |
| ship12l  | 1151  | 5427   | 707     | 706  | 706   | 0.22       | 0.01   | 0.04 | 0.16      | 2      | 57   |
| ship12s  | 1151  | 2763   | 728     | 728  | 728   | 0.19       | 0.00   | 0.03 | 0.16      | 2      | 47   |
| sierra   | 1227  | 2036   | 373     | 361  | 361   | 0.18       | 0.00   | 0.04 | 0.14      | 5      | 92   |
| stair    | 356   | 467    | 350     | 349  | 349   | 0.01       | 0.00   | 0.00 | 0.00      | 2      | 2    |
| standata | 359   | 1075   | 71      | 50   | 50    | 0.05       | 0.00   | 0.04 | 0.00      | 10     | 146  |
| standgub | 361   | 1184   | 71      | 50   | 50    | 0.04       | 0.00   | 0.03 | 0.00      | 10     | 146  |
| standmps | 467   | 1075   | 190     | 174  | 174   | 0.05       | 0.01   | 0.05 | 0.00      | 15     | 144  |
| stocfor1 | 117   | 111    | 69      | 69   | 69    | 0.00       | 0.00   | 0.00 | 0.00      | 2      | 3    |
| stocfor2 | 2157  | 2031   | 1267    | 1267 | 1267  | 0.85       | 0.00   | 0.13 | 0.72      | 2      | 123  |
| truss    | 1000  | 8806   | 802     | 691  | 698   | 0.87       | 0.18   | 0.56 | 0.13      | 102    | 300  |
| tuff     | 333   | 587    | 165     | 122  | 122   | 0.04       | 0.02   | 0.02 | 0.00      | 43     | 60   |
| vtp.base | 198   | 203    | 55      | 55   | 55    | 0.00       | 0.00   | 0.00 | 0.00      | 2      | 2    |
| wood1p   | 244   | 2594   | 39      | 39   | 39    | 0.14       | 0.00   | 0.14 | 0.00      | 2      | 134  |
| woodw    | 1098  | 8405   | 696     | 550  | 550   | 0.60       | 0.27   | 0.19 | 0.13      | 146    | 81   |

“p” means the basis is only primal optimal (dual infeasible). “d” means the basis is only dual optimal (primal infeasible). “a” means the basis is near-optimal but primal-dual infeasible. All OLS subproblems are solved by direct QR factorization.

**Table 3** Crossover results ( $10^{-6}$  solutions) for the first half of the 100 NETLIB instances.

| prob     | nRows | nCols | # supp. |      |       | time (sec) |        |      |           | nOLS   |      |
|----------|-------|-------|---------|------|-------|------------|--------|------|-----------|--------|------|
|          |       |       | PDLP    | COPT | cross | cross      | primal | dual | lin. ind. | primal | dual |
| 25fv47   | 821   | 1571  | 601     | 583  | 584   | 0.13       | 0.02   | 0.08 | 0.03      | 17     | 50   |
| 80bau3b  | 2262  | 9799  | 1852    | 1759 | 1742  | 1.28a      | 0.16   | 0.37 | 0.74      | 69     | 225  |
| adlittle | 56    | 97    | 64      | 45   | 45    | 0.01p      | 0.01   | 0.00 | 0.00      | 17     | 2    |
| afiro    | 27    | 32    | 14      | 13   | 13    | 0.00       | 0.00   | 0.00 | 0.00      | 2      | 2    |
| agg      | 488   | 163   | 62      | 57   | 57    | 0.01       | 0.00   | 0.00 | 0.00      | 6      | 2    |
| agg2     | 516   | 302   | 141     | 120  | 121   | 0.01       | 0.01   | 0.00 | 0.00      | 26     | 4    |
| agg3     | 516   | 302   | 144     | 124  | 124   | 0.02       | 0.02   | 0.00 | 0.00      | 26     | 2    |
| bandm    | 305   | 472   | 326     | 294  | 294   | 0.01       | 0.00   | 0.00 | 0.00      | 2      | 2    |
| beaconfd | 173   | 262   | 89      | 89   | 89    | 0.00       | 0.00   | 0.00 | 0.00      | 2      | 2    |
| blend    | 74    | 83    | 56      | 54   | 54    | 0.00       | 0.00   | 0.00 | 0.00      | 3      | 3    |
| bnl1     | 643   | 1175  | 689     | 451  | 449   | 0.35       | 0.32   | 0.01 | 0.02      | 230    | 6    |
| bnl2     | 2324  | 3489  | 1523    | 1170 | 1165  | 1.90p      | 0.68   | 0.22 | 0.99      | 359    | 79   |
| boeing1  | 351   | 384   | 210     | 195  | 196   | 0.03a      | 0.01   | 0.02 | 0.00      | 18     | 26   |
| boeing2  | 166   | 143   | 69      | 55   | 57    | 0.01       | 0.00   | 0.00 | 0.00      | 14     | 30   |
| bore3d   | 233   | 315   | 127     | 126  | 126   | 0.00       | 0.00   | 0.00 | 0.00      | 2      | 2    |
| brandy   | 220   | 249   | 136     | 134  | 134   | 0.01       | 0.00   | 0.00 | 0.00      | 2      | 2    |
| capri    | 271   | 353   | 246     | 220  | 220   | 0.02       | 0.02   | 0.00 | 0.00      | 35     | 8    |
| cre-a    | 3516  | 4067  | 578     | 493  | 490   | 10.96      | 0.16   | 9.91 | 0.89      | 110    | 1026 |
| cre-c    | 3068  | 3678  | 591     | 508  | 503   | 8.69       | 0.14   | 7.76 | 0.80      | 99     | 766  |
| cycle    | 1903  | 2857  | 1032    | 358  | 229   | 1.05       | 0.33   | 0.37 | 0.34      | 403    | 390  |
| czprob   | 929   | 3523  | 925     | 866  | 866   | 0.21p      | 0.17   | 0.00 | 0.03      | 60     | 2    |
| d2q06c   | 2171  | 5167  | 1645    | 1542 | 1542  | 1.40d      | 0.13   | 0.57 | 0.69      | 31     | 125  |
| d6cube   | 415   | 6184  | 138     | 115  | 110   | 0.60       | 0.02   | 0.56 | 0.01      | 21     | 284  |
| degen2   | 444   | 534   | 207     | 207  | 207   | 0.28       | 0.00   | 0.25 | 0.03      | 2      | 206  |
| degen3   | 1503  | 1818  | 645     | 637  | 637   | 7.90       | 0.01   | 7.09 | 0.79      | 3      | 776  |
| e226     | 223   | 282   | 129     | 127  | 127   | 0.01       | 0.00   | 0.00 | 0.00      | 2      | 5    |
| etamacro | 400   | 688   | 299     | 269  | 269   | 0.04d      | 0.02   | 0.01 | 0.01      | 25     | 48   |
| ffff800  | 524   | 854   | 367     | 313  | 311   | 0.05p      | 0.02   | 0.01 | 0.01      | 53     | 36   |
| finnis   | 497   | 614   | 246     | 228  | 230   | 0.05d      | 0.02   | 0.02 | 0.01      | 47     | 64   |
| fit1d    | 24    | 1026  | 12      | 12   | 12    | 0.00       | 0.00   | 0.00 | 0.00      | 2      | 0    |
| fit1p    | 627   | 1677  | 634     | 627  | 627   | 0.00       | 0.00   | 0.00 | 0.00      | 2      | 0    |
| fit2d    | 25    | 10500 | 22      | 20   | 20    | 0.01       | 0.01   | 0.00 | 0.00      | 3      | 0    |
| fit2p    | 3000  | 13525 | 3007    | 2997 | 2996  | 0.07d      | 0.00   | 0.01 | 0.05      | 2      | 5    |
| forplan  | 161   | 421   | 85      | 83   | 83    | 0.01p      | 0.00   | 0.01 | 0.00      | 3      | 25   |
| ganges   | 1309  | 1681  | 1278    | 1175 | 1173  | 0.18d      | 0.08   | 0.00 | 0.10      | 103    | 7    |
| gfrd-pnc | 616   | 1092  | 349     | 336  | 336   | 0.17       | 0.00   | 0.15 | 0.02      | 2      | 125  |
| greenbeb | 2392  | 5405  | 1074    | 939  | 935   | 3.48p      | 0.25   | 2.21 | 1.02      | 122    | 598  |
| grow15   | 300   | 645   | 533     | 299  | 300   | 0.35       | 0.35   | 0.00 | 0.00      | 234    | 0    |
| grow22   | 440   | 946   | 849     | 440  | 440   | 0.61       | 0.61   | 0.00 | 0.00      | 410    | 0    |
| grow7    | 140   | 301   | 237     | 140  | 140   | 0.05       | 0.05   | 0.00 | 0.00      | 98     | 0    |
| israel   | 174   | 142   | 79      | 69   | 68    | 0.04p      | 0.01   | 0.00 | 0.01      | 23     | 0    |
| kb2      | 43    | 41    | 30      | 27   | 27    | 0.00       | 0.00   | 0.00 | 0.00      | 2      | 0    |
| ken-07   | 2426  | 3602  | 2235    | 2234 | 2234  | 1.23       | 0.00   | 0.04 | 1.18      | 2      | 65   |
| lotfi    | 153   | 308   | 129     | 99   | 99    | 0.01       | 0.01   | 0.00 | 0.00      | 29     | 2    |
| maros-r7 | 3136  | 9408  | 3135    | 3136 | 3136  | 0.24       | 0.03   | 0.11 | 0.08      | 2      | 2    |
| maros    | 846   | 1443  | 351     | 340  | 339   | 0.23p      | 0.01   | 0.17 | 0.05      | 8      | 161  |
| modszk1  | 687   | 1620  | 666     | 666  | 666   | 0.05       | 0.00   | 0.02 | 0.03      | 2      | 20   |
| nesm     | 662   | 2923  | 758     | 553  | 538   | 0.17a      | 0.17   | 0.00 | 0.00      | 218    | 2    |
| osa-07   | 1118  | 23949 | 358     | 355  | 355   | 0.06       | 0.01   | 0.02 | 0.02      | 8      | 6    |
| osa-14   | 2337  | 52460 | 882     | 781  | 781   | 0.50       | 0.34   | 0.03 | 0.13      | 92     | 6    |

“p” means the basis is only primal optimal (dual infeasible). “d” means the basis is only dual optimal (primal infeasible). “a” means the basis is near-optimal but primal-dual infeasible. All OLS subproblems are solved by direct QR factorization.

**Table 4** Crossover results ( $10^{-6}$  solutions) for the second half of the 100 NETLIB instances.

| prob     | nRows | nCols  | # supp. |      |       | time (sec) |        |       |           | nOLS   |      |
|----------|-------|--------|---------|------|-------|------------|--------|-------|-----------|--------|------|
|          |       |        | PDLP    | COPT | cross | cross      | primal | dual  | lin. ind. | primal | dual |
| osa-30   | 4350  | 100024 | 1741    | 1536 | 1536  | 2.01       | 1.48   | 0.06  | 0.46      | 207    | 6    |
| pds-02   | 2953  | 7535   | 1389    | 332  | 319   | 1.77       | 0.78   | 0.37  | 0.62      | 432    | 402  |
| perold   | 625   | 1376   | 608     | 546  | 549   | 0.15d      | 0.08   | 0.05  | 0.02      | 38     | 27   |
| pilot.ja | 940   | 1988   | 823     | 680  | 675   | 0.52d      | 0.32   | 0.09  | 0.10      | 97     | 33   |
| pilot    | 1441  | 3652   | 1308    | 1284 | 1209  | 10.19a     | 0.33   | 9.62  | 0.22      | 27     | 1628 |
| pilot4   | 410   | 1000   | 382     | 363  | 360   | 0.03d      | 0.01   | 0.01  | 0.01      | 13     | 9    |
| pilot87  | 2030  | 4883   | 1976    | 1840 | 1800  | 27.52a     | 2.48   | 24.68 | 0.34      | 111    | 2325 |
| pilotnov | 975   | 2172   | 1809    | 704  | 647   | 1.80d      | 1.68   | 0.00  | 0.11      | 1154   | 2    |
| qap12    | 3192  | 8856   | 2980    | 2441 | 2449  | 61.98d     | 27.69  | 8.81  | 25.45     | 377    | 222  |
| qap8     | 912   | 1632   | 656     | 466  | 440   | 1.05       | 0.28   | 0.19  | 0.57      | 56     | 103  |
| recipe   | 91    | 180    | 24      | 24   | 24    | 0.00       | 0.00   | 0.00  | 0.00      | 2      | 5    |
| sc105    | 105   | 103    | 85      | 85   | 85    | 0.01       | 0.00   | 0.00  | 0.00      | 2      | 6    |
| sc205    | 205   | 203    | 184     | 184  | 184   | 0.01       | 0.00   | 0.00  | 0.00      | 2      | 6    |
| sc50a    | 50    | 48     | 42      | 42   | 42    | 0.01       | 0.00   | 0.00  | 0.00      | 2      | 2    |
| sc50b    | 50    | 48     | 48      | 48   | 48    | 0.00       | 0.00   | 0.00  | 0.00      | 2      | 2    |
| scagr25  | 471   | 500    | 317     | 307  | 307   | 0.01       | 0.00   | 0.00  | 0.00      | 2      | 2    |
| scagr7   | 129   | 140    | 98      | 97   | 97    | 0.00       | 0.00   | 0.00  | 0.00      | 2      | 0    |
| scfxm1   | 330   | 457    | 253     | 231  | 231   | 0.02       | 0.01   | 0.01  | 0.00      | 13     | 21   |
| scfxm2   | 660   | 914    | 515     | 473  | 471   | 0.06       | 0.03   | 0.02  | 0.01      | 24     | 27   |
| scfxm3   | 990   | 1371   | 754     | 711  | 711   | 0.11       | 0.03   | 0.04  | 0.04      | 35     | 33   |
| scorpion | 388   | 358    | 246     | 245  | 245   | 0.01       | 0.00   | 0.00  | 0.01      | 2      | 2    |
| scrs8    | 490   | 1169   | 276     | 276  | 276   | 0.02       | 0.00   | 0.00  | 0.01      | 2      | 10   |
| scsd1    | 77    | 760    | 31      | 7    | 11    | 0.03       | 0.01   | 0.02  | 0.00      | 13     | 61   |
| scsd6    | 147   | 1350   | 182     | 60   | 60    | 0.05       | 0.03   | 0.01  | 0.00      | 84     | 55   |
| scsd8    | 397   | 2750   | 551     | 147  | 208   | 0.14       | 0.12   | 0.01  | 0.00      | 175    | 21   |
| sctap1   | 300   | 480    | 263     | 164  | 163   | 0.06       | 0.04   | 0.02  | 0.00      | 102    | 46   |
| sctap2   | 1090  | 1880   | 817     | 562  | 561   | 0.26       | 0.11   | 0.06  | 0.09      | 231    | 143  |
| sctap3   | 1480  | 2480   | 1040    | 731  | 729   | 0.53       | 0.19   | 0.13  | 0.21      | 279    | 273  |
| seba     | 515   | 1028   | 438     | 438  | 438   | 0.00       | 0.00   | 0.00  | 0.00      | 2      | 2    |
| share1b  | 117   | 225    | 98      | 94   | 93    | 0.00p      | 0.00   | 0.00  | 0.00      | 4      | 0    |
| share2b  | 96    | 79     | 52      | 48   | 48    | 0.01       | 0.00   | 0.00  | 0.00      | 7      | 11   |
| shell    | 536   | 1775   | 392     | 383  | 383   | 0.03       | 0.00   | 0.01  | 0.02      | 2      | 48   |
| ship04l  | 402   | 2118   | 261     | 260  | 260   | 0.02       | 0.00   | 0.02  | 0.01      | 2      | 24   |
| ship04s  | 402   | 1458   | 281     | 280  | 280   | 0.02       | 0.00   | 0.01  | 0.01      | 2      | 16   |
| ship08l  | 778   | 4283   | 423     | 422  | 422   | 0.09       | 0.00   | 0.03  | 0.05      | 2      | 34   |
| ship08s  | 778   | 2387   | 448     | 447  | 447   | 0.06       | 0.00   | 0.01  | 0.05      | 2      | 22   |
| ship12l  | 1151  | 5427   | 707     | 706  | 706   | 0.21       | 0.00   | 0.04  | 0.16      | 2      | 57   |
| ship12s  | 1151  | 2763   | 729     | 728  | 728   | 0.19       | 0.00   | 0.03  | 0.16      | 2      | 47   |
| sierra   | 1227  | 2036   | 377     | 361  | 361   | 0.18       | 0.01   | 0.03  | 0.14      | 5      | 92   |
| stair    | 356   | 467    | 350     | 349  | 349   | 0.01       | 0.00   | 0.00  | 0.00      | 2      | 2    |
| standata | 359   | 1075   | 71      | 50   | 50    | 0.05       | 0.00   | 0.04  | 0.00      | 10     | 146  |
| standgub | 361   | 1184   | 71      | 50   | 50    | 0.04       | 0.00   | 0.03  | 0.00      | 10     | 146  |
| standmps | 467   | 1075   | 190     | 174  | 174   | 0.04       | 0.00   | 0.03  | 0.00      | 15     | 143  |
| stocfor1 | 117   | 111    | 69      | 69   | 69    | 0.00       | 0.00   | 0.00  | 0.00      | 2      | 3    |
| stocfor2 | 2157  | 2031   | 1267    | 1267 | 1267  | 0.85       | 0.00   | 0.13  | 0.71      | 2      | 123  |
| truss    | 1000  | 8806   | 802     | 691  | 691   | 0.90       | 0.22   | 0.56  | 0.12      | 102    | 300  |
| tuff     | 333   | 587    | 167     | 122  | 122   | 0.04       | 0.02   | 0.02  | 0.00      | 43     | 60   |
| vtp.base | 198   | 203    | 55      | 55   | 55    | 0.00       | 0.00   | 0.00  | 0.00      | 2      | 2    |
| wood1p   | 244   | 2594   | 39      | 39   | 39    | 0.18       | 0.00   | 0.18  | 0.00      | 2      | 134  |
| woodw    | 1098  | 8405   | 696     | 550  | 550   | 0.61       | 0.24   | 0.23  | 0.13      | 146    | 81   |

“p” means the basis is only primal optimal (dual infeasible). “d” means the basis is only dual optimal (primal infeasible). “a” means the basis is near-optimal but primal-dual infeasible. All OLS subproblems are solved by direct QR factorization.

**Table 5** Crossover results with auxiliary LPs ( $10^{-8}$  solutions) for the first half of the 100 NETLIB instances.

| prob     | nRows | nCols | # supp. |      |       | time (sec) |         |        |      |           | nOLS   |      |
|----------|-------|-------|---------|------|-------|------------|---------|--------|------|-----------|--------|------|
|          |       |       | PDLP    | COPT | cross | cross      | aux. LP | primal | dual | lin. ind. | primal | dual |
| 25fv47   | 821   | 1571  | 600     | 583  | 584   | 1.01       | 0.96    | 0.01   | 0.00 | 0.03      | 1      | 2    |
| 80bau3b  | 2262  | 9799  | 1851    | 1758 | 1755  | 0.77       | 0.05    | 0.00   | 0.00 | 0.71      | 1      | 1    |
| adlittle | 56    | 97    | 61      | 45   | 44    | 0.01       | 0.01    | 0.00   | 0.00 | 0.00      | 1      | 1    |
| afiro    | 27    | 32    | 14      | 13   | 14    | 0.00       | 0.00    | 0.00   | 0.00 | 0.00      | 1      | 1    |
| agg      | 488   | 163   | 62      | 57   | 57    | 0.01       | 0.01    | 0.00   | 0.00 | 0.00      | 1      | 1    |
| agg2     | 516   | 302   | 141     | 120  | 121   | 0.01       | 0.01    | 0.00   | 0.00 | 0.00      | 2      | 1    |
| agg3     | 516   | 302   | 144     | 124  | 125   | 0.01       | 0.01    | 0.00   | 0.00 | 0.00      | 2      | 1    |
| bandm    | 305   | 472   | 306     | 294  | 294   | 0.07       | 0.06    | 0.00   | 0.00 | 0.00      | 1      | 1    |
| beaconfd | 173   | 262   | 89      | 89   | 89    | 0.01       | 0.00    | 0.00   | 0.00 | 0.00      | 1      | 1    |
| blend    | 74    | 83    | 56      | 54   | 54    | 0.01       | 0.00    | 0.00   | 0.00 | 0.00      | 1      | 1    |
| bnl1     | 643   | 1175  | 689     | 451  | 448   | 6.29       | 6.27    | 0.00   | 0.00 | 0.02      | 1      | 1    |
| bnl2     | 2324  | 3489  | 1519    | 1171 | 1168  | 2.22       | 1.19    | 0.00   | 0.01 | 1.01      | 2      | 3    |
| boeing1  | 351   | 384   | 207     | 196  | 195   | 0.04       | 0.03    | 0.00   | 0.00 | 0.00      | 1      | 3    |
| boeing2  | 166   | 143   | 69      | 55   | 55    | 0.01       | 0.01    | 0.00   | 0.00 | 0.00      | 1      | 3    |
| bore3d   | 233   | 315   | 126     | 126  | 126   | 0.01       | 0.01    | 0.00   | 0.00 | 0.00      | 1      | 1    |
| brandy   | 220   | 249   | 135     | 134  | 134   | 0.05       | 0.04    | 0.00   | 0.00 | 0.00      | 1      | 1    |
| capri    | 271   | 353   | 246     | 220  | 225   | 0.02       | 0.02    | 0.00   | 0.00 | 0.00      | 1      | 1    |
| cre-a    | 3516  | 4067  | 579     | 492  | 484   | 1.27       | 0.08    | 0.00   | 0.35 | 0.81      | 1      | 41   |
| cre-c    | 3068  | 3678  | 590     | 508  | 503   | 2.22       | 0.22    | 0.00   | 1.23 | 0.75      | 2      | 46   |
| cycle    | 1903  | 2857  | 994     | 224  | 105   | 2.04p      | 2.00    | 0.00   | 0.01 | 0.03      | 1      | 9    |
| czprob   | 929   | 3523  | 924     | 866  | 866   | 0.06       | 0.03    | 0.00   | 0.00 | 0.03      | 1      | 1    |
| d2q06c   | 2171  | 5167  | 1612    | 1543 | 1541  | 93.46      | 92.75   | 0.00   | 0.05 | 0.65      | 1      | 11   |
| d6cube   | 415   | 6184  | 136     | 115  | 101   | 13.38      | 13.30   | 0.00   | 0.06 | 0.01      | 1      | 7    |
| degen2   | 444   | 534   | 207     | 207  | 207   | 0.33       | 0.13    | 0.00   | 0.16 | 0.03      | 1      | 111  |
| degen3   | 1503  | 1818  | 640     | 637  | 637   | 8.20       | 2.87    | 0.01   | 4.41 | 0.79      | 1      | 475  |
| e226     | 223   | 282   | 127     | 127  | 127   | 0.05       | 0.04    | 0.00   | 0.00 | 0.00      | 1      | 1    |
| etamacro | 400   | 688   | 292     | 271  | 272   | 0.03       | 0.01    | 0.00   | 0.00 | 0.01      | 1      | 12   |
| ffff800  | 524   | 854   | 357     | 312  | 315   | 0.03       | 0.01    | 0.00   | 0.00 | 0.01      | 7      | 1    |
| finnis   | 497   | 614   | 259     | 227  | 229   | 0.02       | 0.01    | 0.00   | 0.00 | 0.01      | 2      | 4    |
| fit1d    | 24    | 1026  | 12      | 12   | 12    | 0.01       | 0.00    | 0.00   | 0.00 | 0.00      | 1      | 0    |
| fit1p    | 627   | 1677  | 634     | 627  | 627   | 0.60       | 0.59    | 0.00   | 0.00 | 0.00      | 1      | 0    |
| fit2d    | 25    | 10500 | 22      | 20   | 20    | 0.01       | 0.01    | 0.00   | 0.00 | 0.00      | 1      | 0    |
| fit2p    | 3000  | 13525 | 3004    | 2997 | 2997  | 5.08       | 5.05    | 0.00   | 0.00 | 0.03      | 1      | 1    |
| forplan  | 161   | 421   | 83      | 83   | 83    | 1.65       | 1.64    | 0.00   | 0.00 | 0.00      | 1      | 1    |
| ganges   | 1309  | 1681  | 1278    | 1175 | 1171  | t          |         |        |      |           |        |      |
| gfrd-pnc | 616   | 1092  | 349     | 336  | 336   | 0.05       | 0.02    | 0.00   | 0.01 | 0.02      | 1      | 23   |
| greenbeb | 2392  | 5405  | 1048    | 937  | 942   | 114.78     | 113.76  | 0.00   | 0.00 | 1.01      | 1      | 1    |
| grow15   | 300   | 645   | 533     | 299  | 300   | 0.20       | 0.19    | 0.00   | 0.00 | 0.00      | 1      | 0    |
| grow22   | 440   | 946   | 849     | 440  | 440   | 0.38       | 0.37    | 0.00   | 0.00 | 0.00      | 1      | 0    |
| grow7    | 140   | 301   | 237     | 140  | 140   | 0.02       | 0.02    | 0.00   | 0.00 | 0.00      | 1      | 0    |
| israel   | 174   | 142   | 80      | 70   | 68    | 0.01       | 0.01    | 0.00   | 0.00 | 0.00      | 7      | 0    |
| kb2      | 43    | 41    | 27      | 27   | 27    | 0.01       | 0.01    | 0.00   | 0.00 | 0.00      | 1      | 0    |
| ken-07   | 2426  | 3602  | 2236    | 2234 | 2234  | 1.22       | 0.03    | 0.00   | 0.00 | 1.18      | 1      | 4    |
| lotfi    | 153   | 308   | 126     | 99   | 98    | 0.01       | 0.01    | 0.00   | 0.00 | 0.00      | 1      | 1    |
| maros-r7 | 3136  | 9408  | 3136    | 3136 | 3136  | 0.33       | 0.28    | 0.01   | 0.00 | 0.01      | 1      | 0    |
| maros    | 846   | 1443  | 345     | 340  | 339   | 1.84       | 1.77    | 0.00   | 0.01 | 0.05      | 3      | 11   |
| modszk1  | 687   | 1620  | 666     | 666  | 666   | 0.05       | 0.01    | 0.00   | 0.00 | 0.03      | 1      | 1    |
| nesm     | 662   | 2923  | 726     | 550  | 545   | t          |         |        |      |           |        |      |
| osa-07   | 1118  | 23949 | 357     | 355  | 355   | 0.16       | 0.13    | 0.00   | 0.00 | 0.02      | 1      | 1    |
| osa-14   | 2337  | 52460 | 873     | 781  | 781   | f          |         |        |      |           |        |      |

“p” means the basis is only primal optimal (dual infeasible). “d” means the basis is only dual optimal (primal infeasible). “a” means the basis is near-optimal but primal-dual infeasible. “t” means crossover timed out. “f” means crossover failed. All OLS subproblems are solved by direct QR factorization.

**Table 6 Crossover results with auxiliary LPs ( $10^{-8}$  solutions) for the second half of the 100 NETLIB instances.**

| prob     | nRows | nCols  | # supp. |      |       | time (sec) |         |        |      |           | nOLS   |      |
|----------|-------|--------|---------|------|-------|------------|---------|--------|------|-----------|--------|------|
|          |       |        | PDLP    | COPT | cross | cross      | aux. LP | primal | dual | lin. ind. | primal | dual |
| osa-30   | 4350  | 100024 | 1733    | 1536 | 1536  | f          |         |        |      |           |        |      |
| pds-02   | 2953  | 7535   | 1379    | 332  | 320   | 0.40       | 0.06    | 0.00   | 0.02 | 0.31      | 3      | 30   |
| perold   | 625   | 1376   | 580     | 546  | 547   | 54.13d     | 54.10   | 0.00   | 0.00 | 0.02      | 1      | 1    |
| pilot.ja | 940   | 1988   | 789     | 681  | 661   | t          |         |        |      |           |        |      |
| pilot    | 1441  | 3652   | 1299    | 1287 | 1298  | t          |         |        |      |           |        |      |
| pilot4   | 410   | 1000   | 374     | 364  | 364   | 99.07      | 99.06   | 0.00   | 0.00 | 0.01      | 2      | 1    |
| pilot87  | 2030  | 4883   | 1856    | 1840 | 1840  | t          |         |        |      |           |        |      |
| pilotnov | 975   | 2172   | 1809    | 708  | 642   | 54.40d     | 54.26   | 0.03   | 0.00 | 0.10      | 11     | 1    |
| qap12    | 3192  | 8856   | 2940    | 2462 | 2446  | 63.12      | 32.86   | 0.06   | 4.88 | 25.29     | 1      | 112  |
| qap8     | 912   | 1632   | 656     | 466  | 418   | 0.53       | 0.09    | 0.00   | 0.16 | 0.26      | 1      | 96   |
| recipe   | 91    | 180    | 24      | 24   | 24    | 0.01       | 0.00    | 0.00   | 0.00 | 0.00      | 1      | 1    |
| sc105    | 105   | 103    | 85      | 85   | 85    | 0.01       | 0.00    | 0.00   | 0.00 | 0.00      | 1      | 1    |
| sc205    | 205   | 203    | 184     | 184  | 184   | 0.01       | 0.01    | 0.00   | 0.00 | 0.00      | 1      | 1    |
| sc50a    | 50    | 48     | 42      | 42   | 42    | 0.01       | 0.00    | 0.00   | 0.00 | 0.00      | 1      | 1    |
| sc50b    | 50    | 48     | 48      | 48   | 48    | 0.01       | 0.00    | 0.00   | 0.00 | 0.00      | 1      | 1    |
| scagr25  | 471   | 500    | 317     | 307  | 307   | 0.01       | 0.01    | 0.00   | 0.00 | 0.00      | 1      | 1    |
| scagr7   | 129   | 140    | 98      | 97   | 97    | 0.00       | 0.00    | 0.00   | 0.00 | 0.00      | 1      | 0    |
| scfxm1   | 330   | 457    | 248     | 231  | 232   | 0.03       | 0.02    | 0.00   | 0.00 | 0.00      | 2      | 2    |
| scfxm2   | 660   | 914    | 501     | 473  | 471   | 0.06       | 0.04    | 0.00   | 0.00 | 0.01      | 1      | 3    |
| scfxm3   | 990   | 1371   | 754     | 711  | 711   | 0.15       | 0.10    | 0.00   | 0.00 | 0.04      | 1      | 1    |
| scorpion | 388   | 358    | 245     | 245  | 245   | 0.02       | 0.01    | 0.00   | 0.00 | 0.01      | 1      | 1    |
| scrs8    | 490   | 1169   | 276     | 276  | 276   | 0.05       | 0.03    | 0.00   | 0.00 | 0.01      | 1      | 1    |
| scsd1    | 77    | 760    | 31      | 7    | 11    | 0.02       | 0.01    | 0.00   | 0.01 | 0.00      | 1      | 59   |
| scsd6    | 147   | 1350   | 182     | 63   | 56    | 0.02       | 0.01    | 0.00   | 0.01 | 0.00      | 1      | 34   |
| scsd8    | 397   | 2750   | 551     | 147  | 143   | 0.16       | 0.14    | 0.00   | 0.01 | 0.00      | 1      | 21   |
| sectap1  | 300   | 480    | 263     | 164  | 168   | 0.04       | 0.03    | 0.00   | 0.00 | 0.01      | 4      | 5    |
| sectap2  | 1090  | 1880   | 811     | 562  | 564   | 0.13       | 0.03    | 0.00   | 0.00 | 0.09      | 3      | 5    |
| sectap3  | 1480  | 2480   | 1038    | 731  | 732   | 0.26       | 0.03    | 0.00   | 0.01 | 0.21      | 3      | 21   |
| seba     | 515   | 1028   | 438     | 438  | 438   | 0.01       | 0.01    | 0.00   | 0.00 | 0.00      | 1      | 1    |
| share1b  | 117   | 225    | 95      | 94   | 94    | 0.03       | 0.03    | 0.00   | 0.00 | 0.00      | 1      | 0    |
| share2b  | 96    | 79     | 52      | 48   | 48    | 0.04       | 0.03    | 0.00   | 0.00 | 0.00      | 1      | 2    |
| shell    | 536   | 1775   | 391     | 383  | 383   | 0.03       | 0.01    | 0.00   | 0.00 | 0.02      | 1      | 2    |
| ship04l  | 402   | 2118   | 261     | 260  | 260   | 0.03       | 0.02    | 0.00   | 0.00 | 0.01      | 1      | 1    |
| ship04s  | 402   | 1458   | 281     | 280  | 280   | 0.03       | 0.02    | 0.00   | 0.00 | 0.01      | 1      | 4    |
| ship08l  | 778   | 4283   | 422     | 422  | 422   | 0.07       | 0.02    | 0.00   | 0.00 | 0.05      | 1      | 1    |
| ship08s  | 778   | 2387   | 447     | 447  | 447   | 0.07       | 0.02    | 0.00   | 0.00 | 0.05      | 1      | 1    |
| ship12l  | 1151  | 5427   | 707     | 706  | 706   | 0.20       | 0.03    | 0.00   | 0.00 | 0.16      | 1      | 1    |
| ship12s  | 1151  | 2763   | 728     | 728  | 728   | 0.18       | 0.02    | 0.00   | 0.00 | 0.16      | 1      | 1    |
| sierra   | 1227  | 2036   | 373     | 361  | 361   | 0.16       | 0.02    | 0.00   | 0.00 | 0.14      | 1      | 7    |
| stair    | 356   | 467    | 350     | 349  | 349   | 0.20       | 0.20    | 0.00   | 0.00 | 0.00      | 1      | 1    |
| standata | 359   | 1075   | 71      | 50   | 50    | 0.01       | 0.01    | 0.00   | 0.00 | 0.00      | 1      | 1    |
| standgub | 361   | 1184   | 71      | 50   | 50    | 0.01       | 0.01    | 0.00   | 0.00 | 0.00      | 1      | 6    |
| standmps | 467   | 1075   | 190     | 174  | 174   | 0.02       | 0.01    | 0.00   | 0.00 | 0.00      | 1      | 6    |
| stocfor1 | 117   | 111    | 69      | 69   | 69    | 0.01       | 0.01    | 0.00   | 0.00 | 0.00      | 1      | 1    |
| stocfor2 | 2157  | 2031   | 1267    | 1267 | 1267  | 0.76       | 0.02    | 0.00   | 0.02 | 0.72      | 1      | 17   |
| truss    | 1000  | 8806   | 802     | 691  | 689   | 0.73       | 0.08    | 0.00   | 0.47 | 0.12      | 1      | 262  |
| tuff     | 333   | 587    | 165     | 122  | 113   | 0.64       | 0.64    | 0.00   | 0.00 | 0.00      | 1      | 1    |
| vtp.base | 198   | 203    | 55      | 55   | 55    | 0.01       | 0.00    | 0.00   | 0.00 | 0.00      | 1      | 1    |
| wood1p   | 244   | 2594   | 39      | 39   | 39    | 1.40       | 1.40    | 0.00   | 0.00 | 0.00      | 1      | 1    |
| woodw    | 1098  | 8405   | 696     | 550  | 550   | 0.19       | 0.05    | 0.00   | 0.00 | 0.13      | 1      | 1    |

“p” means the basis is only primal optimal (dual infeasible). “d” means the basis is only dual optimal (primal infeasible). “a” means the basis is near-optimal but primal-dual infeasible. “t” means crossover timed out. “f” means crossover failed. All OLS subproblems are solved by direct QR factorization.
